# Supplementary material
Source: HighWire-hosted journal article supplement (https://bmjopen.bmj.com/content/11/5/e044003)
Supplement: inline-supplementary-material-1 [file inline-supplementary-material-1.pdf]

## Appendix A:

| Africa                                                                                                       |                                                                                                                                                                              | Asia                                                                                                                                                                                                                                                                                                                                                                                    | Latin America and the Caribbean                                                                                            |
|--------------------------------------------------------------------------------------------------------------|------------------------------------------------------------------------------------------------------------------------------------------------------------------------------|-----------------------------------------------------------------------------------------------------------------------------------------------------------------------------------------------------------------------------------------------------------------------------------------------------------------------------------------------------------------------------------------|----------------------------------------------------------------------------------------------------------------------------|
| North Africa                                                                                                 | Southern Africa                                                                                                                                                              | East Asia                                                                                                                                                                                                                                                                                                                                                                               | Caribbean                                                                                                                  |
| Algeria<br>Egypt<br>Libya<br>Mauritania<br>Morocco<br>Sudan<br>Tunisia                                       | Angola<br>Botswana<br>Eswathi<br>Lesotho<br>Malawi<br>Mauritius<br>Mozambique<br>Namibia<br>South Africa<br>Zambia<br>Zimbabwe                                               | Brunei Darussalam<br>Cambodia<br>China<br>Democratic People's Republic of Korea<br>Fiji<br>Hong Kong SAR<br>Indonesia<br>Kiribati<br>Lao People's Democratic Republic<br>Malaysia<br>Mongolia<br>Myanmar<br>Papua New Guinea<br>Philippines<br>Republic of Korea<br>Samoa<br>Singapore<br>Solomon Islands<br>Taiwan Province of China<br>Thailand<br>Timor-Leste<br>Vanuatu<br>Viet Nam | Bahamas<br>Barbados<br>Belize<br>Guyana<br>Jamaica<br>Suriname<br>Trinidad and Tobago                                      |
| Central Africa                                                                                               | West Africa                                                                                                                                                                  | South Asia                                                                                                                                                                                                                                                                                                                                                                              | Mexico and Central America                                                                                                 |
| Cameroon<br>Central African Republic<br>Chad<br>Congo<br>Equatorial Guinea<br>Gabon<br>Sao Tome and Principe | Benin<br>Burkina Faso<br>Cabo Verde<br>Côte d'Ivoire<br>Gambia<br>Ghana<br>Guinea<br>Guinea-Bissau<br>Liberia<br>Mali<br>Niger<br>Nigeria<br>Senegal<br>Sierra Leone<br>Togo | Afghanistan<br>Bangladesh<br>Bhutan<br>India<br>Iran (Islamic Republic of)<br>Maldives<br>Nepal<br>Pakistan<br>Sri Lanka                                                                                                                                                                                                                                                                | Costa Rica<br>Cuba<br>Dominican Republic<br>El Salvador<br>Guatemala<br>Haiti<br>Honduras<br>Mexico<br>Nicaragua<br>Panama |
| East Africa                                                                                                  |                                                                                                                                                                              | Western Asia                                                                                                                                                                                                                                                                                                                                                                            | South America                                                                                                              |
| Burundi<br>Comoros                                                                                           |                                                                                                                                                                              | Bahrain<br>Iraq<br>Israel                                                                                                                                                                                                                                                                                                                                                               | Argentina<br>Bolivia (Plurinational State of)                                                                              |

|                                                                                                                                                                         |  |                                                                                                                                                       |                                                                                                           |
|-------------------------------------------------------------------------------------------------------------------------------------------------------------------------|--|-------------------------------------------------------------------------------------------------------------------------------------------------------|-----------------------------------------------------------------------------------------------------------|
| Democratic Republic of the Congo<br>Djibouti<br>Eritrea<br>Ethiopia<br>Kenya<br>Madagascar<br>Rwanda<br>Somalia<br>South Sudan<br>Uganda<br>United Republic of Tanzania |  | Jordan<br>Kuwait<br>Lebanon<br>Oman<br>Qatar<br>Saudi Arabia<br>State of Palestine<br>Syrian Arab Republic<br>Turkey<br>United Arab Emirates<br>Yemen | Brazil<br>Chile<br>Colombia<br>Ecuador<br>Paraguay<br>Peru<br>Uruguay<br>Venezuela (Bolivian Republic of) |
|-------------------------------------------------------------------------------------------------------------------------------------------------------------------------|--|-------------------------------------------------------------------------------------------------------------------------------------------------------|-----------------------------------------------------------------------------------------------------------|
